# Supplementary material
Source: PubMed Central journal article supplement (PMC2980756)

Biophysical Journal, Volume 99

**Supporting Material**

**Title: Nucleotide dependent shape changes in the reverse direction motor, myosin VI**

Authors: Chun Feng Song, Kasim Sader, Howard D. White, John Kendrick-Jones, and John A. Trinick

# Whole Myosin VI - apo

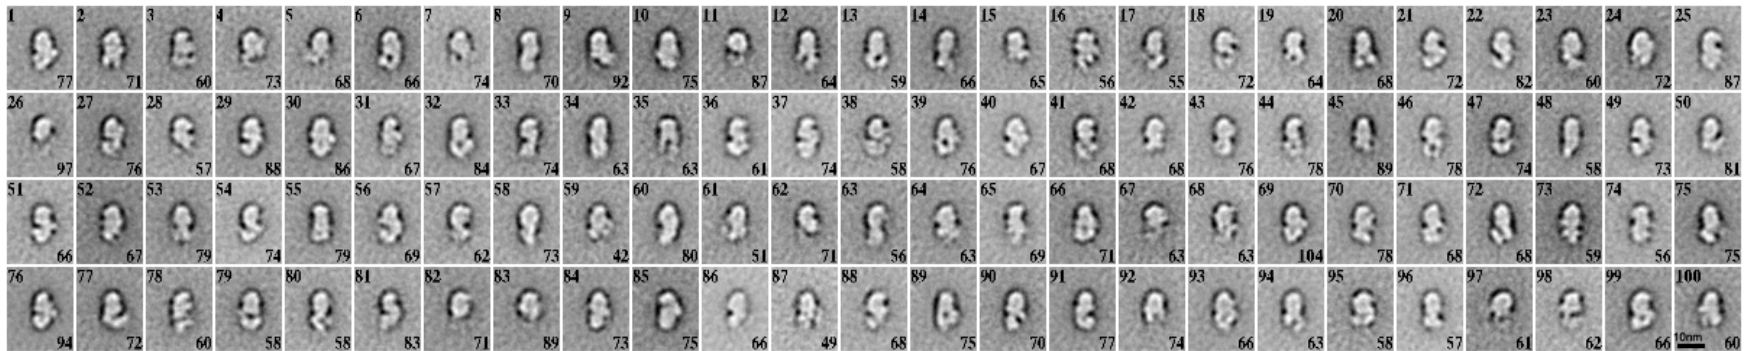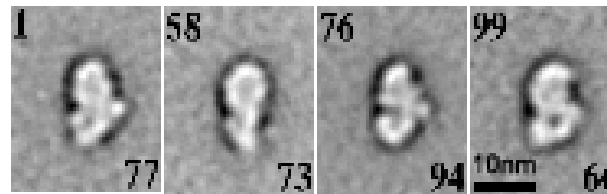

# Apo Myosin VI s1

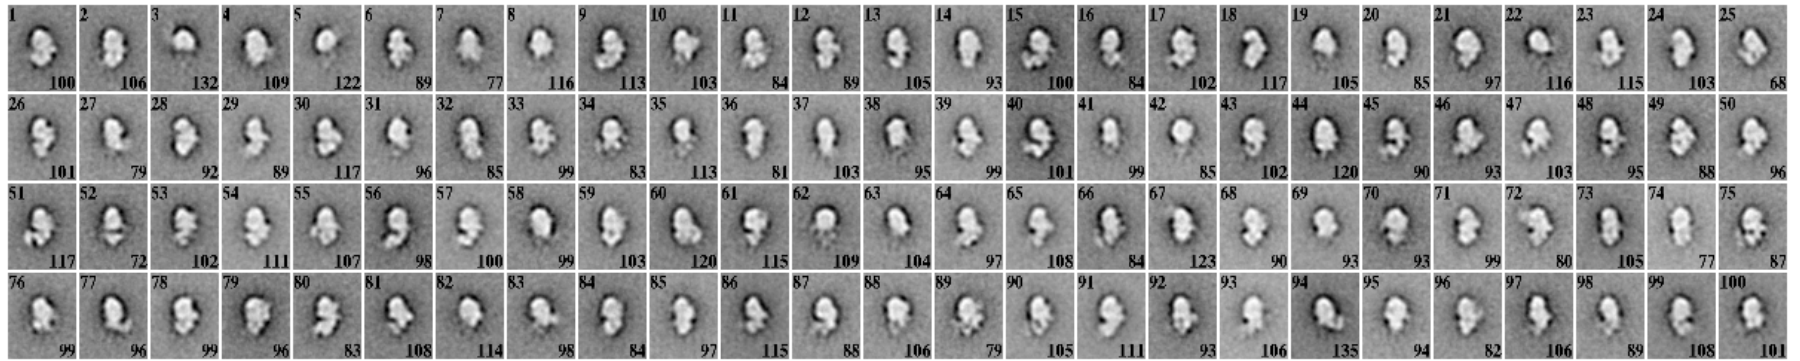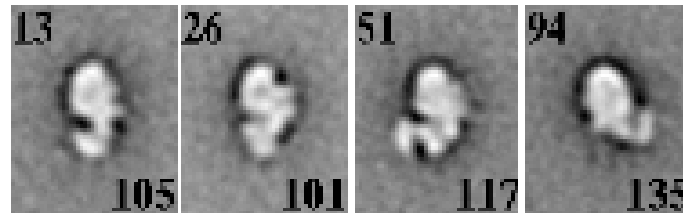

# Whole Myosin VI in ATP

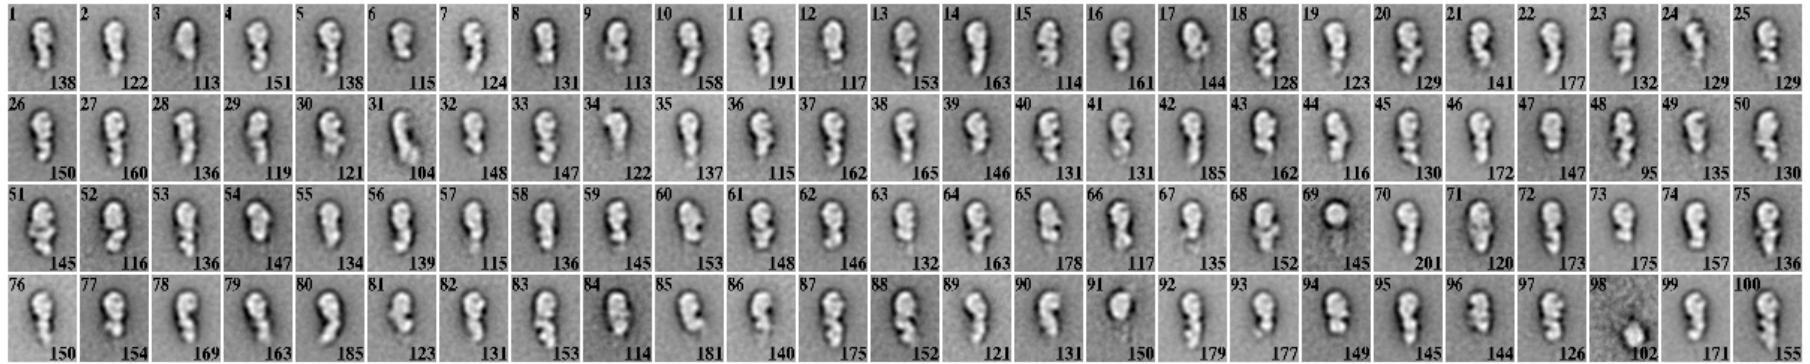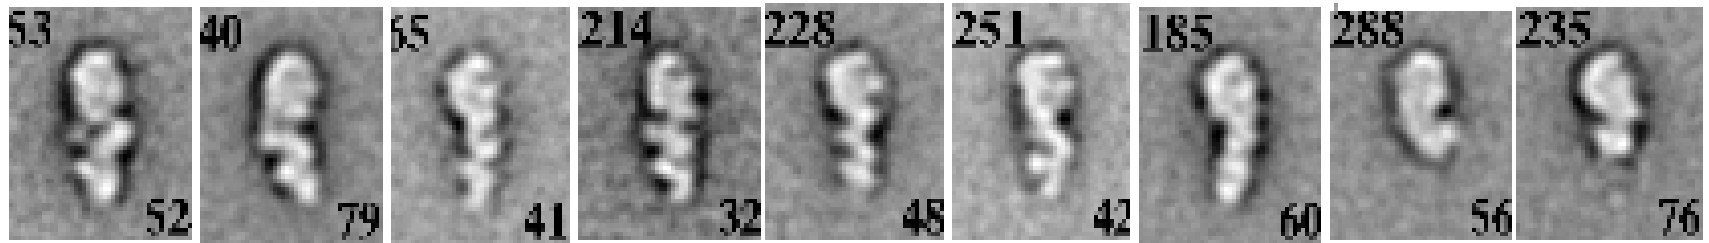

# Whole Myosin VI in ATP- $\gamma$ s

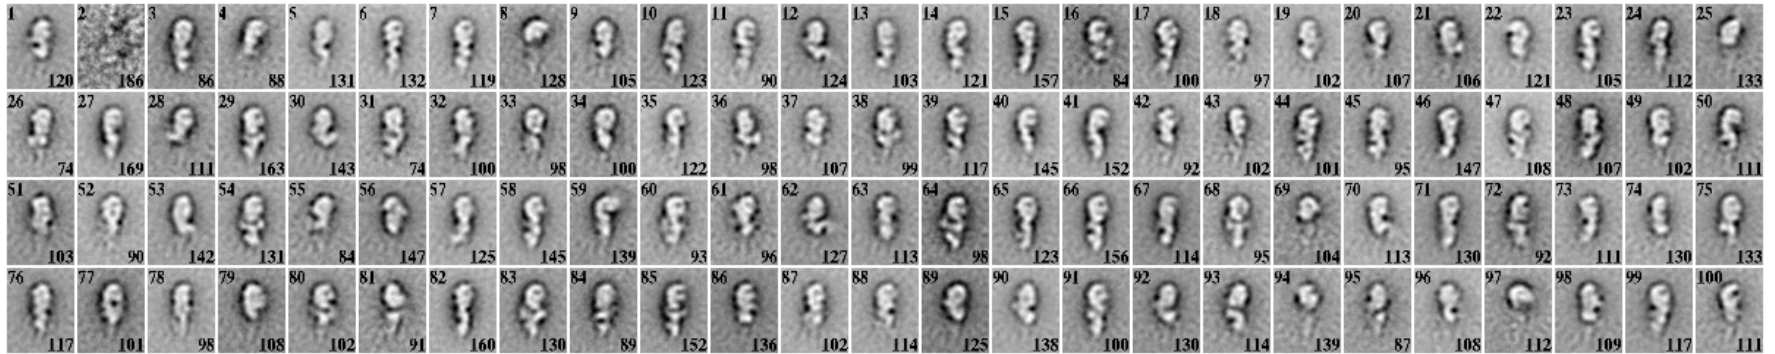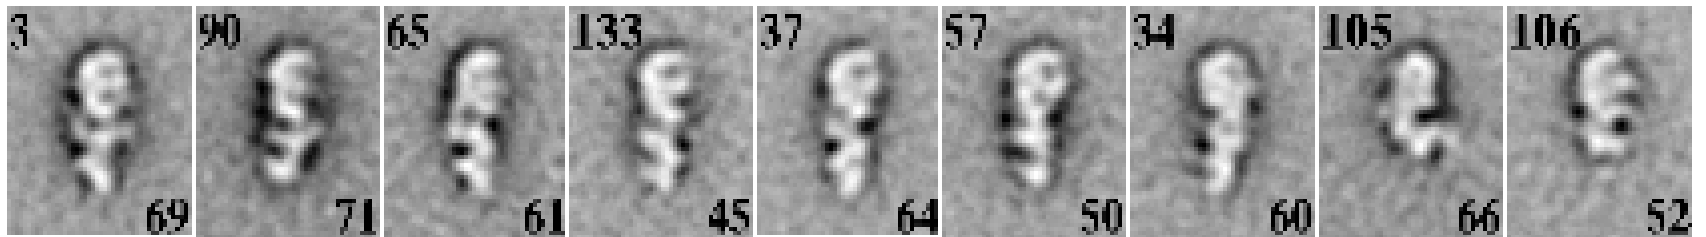

# Myosin VI in ADP

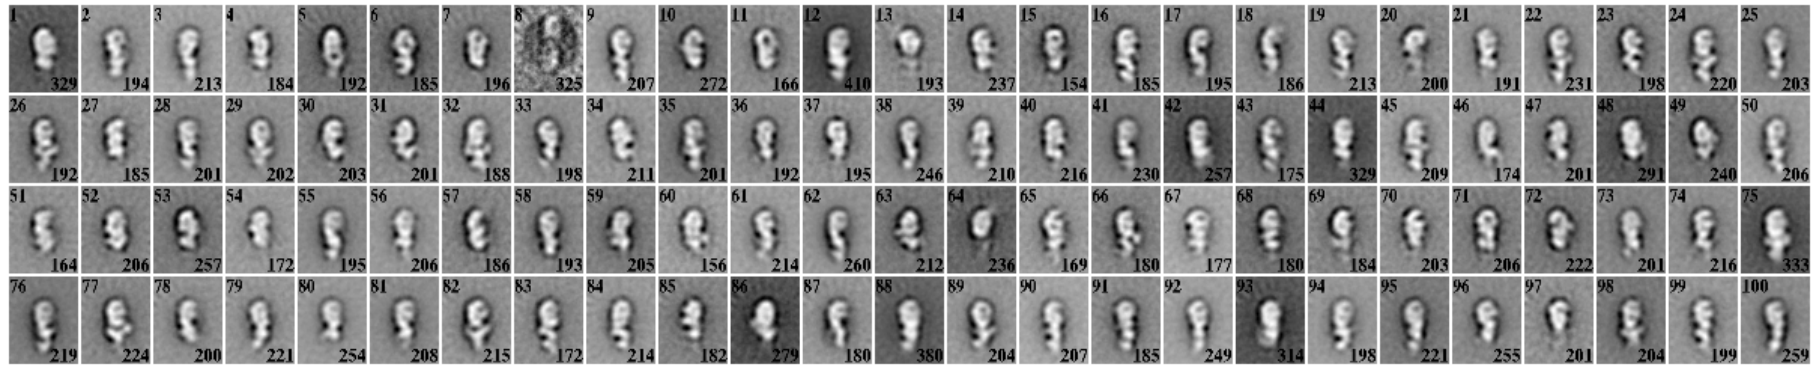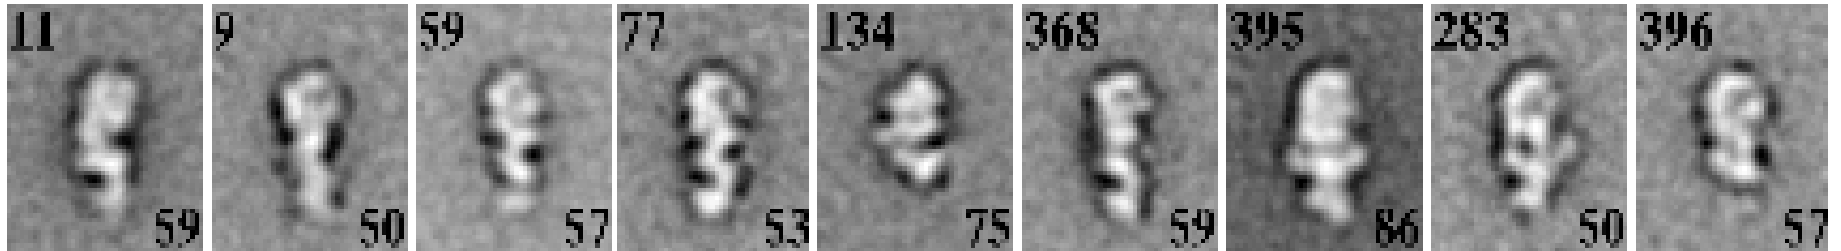

# Myosin VI in ATP and Ca<sup>2+</sup>

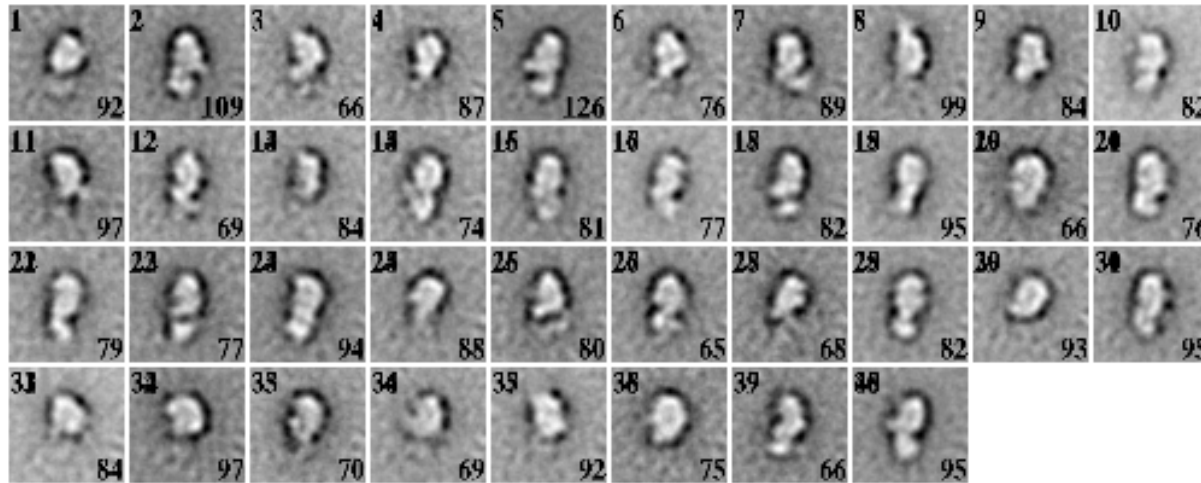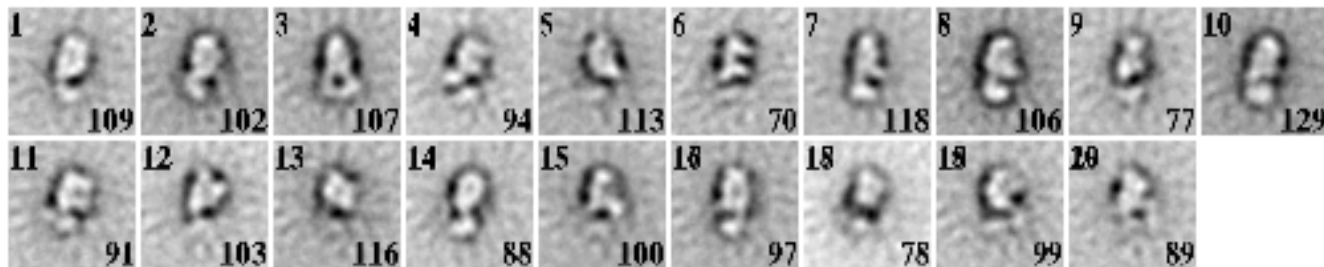

Supplement: mmc1.pdf [file mmc1.pdf]
